# Supplementary material for: Rhubarb Supplementation Prevents Diet-Induced Obesity and Diabetes in Association with Increased Akkermansia muciniphila in Mice
Source: PubMed Central journal article supplement (PMC7601677; doi:10.3390/nu12102932), 2020-09-24
Supplement: nutrients-12-02932-s001.pdf [file nutrients-12-02932-s001.pdf]

Supplemental table 1: Primers used for qPCR amplification

| Primers         |         | Sequences                   |
|-----------------|---------|-----------------------------|
| <b>Ang4</b>     | Forward | CTCTGGCTCAGAATGTAAGGTACGA   |
|                 | Reverse | GAAATCTTTAAAGGCTCGGTACCC    |
| <b>Itgax</b>    | Forward | CAAAATCTCCAACCCATGCT        |
|                 | Reverse | TGTGGTCAGCTCCACAGTTC        |
| <b>Cd163</b>    | Forward | GGCAACAAATACGTGGCTCT        |
|                 | Reverse | ATGGGATTTCTCCTCCAACC        |
| <b>Defa</b>     | Forward | GGTGATCATCAGACCCCAGCATCAGT  |
|                 | Reverse | AAGAGACTAAAAGTGGAGCAGC      |
| <b>Adgre1</b>   | Forward | TGACAACCAGACGGCTTGTG        |
|                 | Reverse | CAGGCGAGGAAAAGATAGTGT       |
| <b>Il1b</b>     | Forward | TCCGTCAGGGTCACAAGAAA        |
|                 | Reverse | CATCAGAGGCAAGGAGGAAAAC      |
| <b>IL10</b>     | Forward | GGACAACATACTGCTAACCGAC      |
|                 | Reverse | AAAATCACTCTTCACCTGCTCG      |
| <b>Intectin</b> | Forward | GTTGCCCTGATTCTGCTGG         |
|                 | Reverse | GCACTATTGCAGAGGTCCGT        |
| <b>Ifng</b>     | Forward | TTCTTCAGCAACAGCAAGGC        |
|                 | Reverse | ACTCCTTTTCCGCTTCCTGA        |
| <b>Lbp</b>      | Forward | GTCCTGGGAATCTGTCCTTG        |
|                 | Reverse | CCGGTAACCTTGCTGTTGTT        |
| <b>Lys1</b>     | Forward | GCCAAGGTCTACAATCGTTGTGAGTTG |
|                 | Reverse | CAGTCAGCCAGCTTGACACCACG     |
| <b>Ccl2</b>     | Forward | GCAGTTAACGCCCCACTCA         |
|                 | Reverse | CCCAGCCTACTCATTGGGATCA      |
| <b>Pla2g2</b>   | Forward | AAGGATCCCCCAAGGATGCCAC      |
|                 | Reverse | CAGCCGTTTCTGACAGGAGTTCTGG   |
| <b>Reg3y</b>    | Forward | TTCTGTCTCCATGATCAAA         |
|                 | Reverse | CATCCACCTCTGTTGGGTTC        |
| <b>Rpl19</b>    | Forward | GAAGGTCAAAGGGAATGTGTTCA     |
|                 | Reverse | CCTGTTGCTCACTTGT            |
| <b>Tnf</b>      | Forward | TCGAGTGACAAGCCTGTAGCC       |
|                 | Reverse | TTGAGATCCATGCCGTTGG         |
